# Supplementary material for: Twenty years of the FIFA Medical Assessment and Research Centre: from ‘Medicine for Football’ to ‘Football for Health’
Source: HighWire-hosted journal article supplement (doi:10.1136/bjsports-2015-094805), 2015-04-15
Supplement: bjsports-2015-094805supp_web_references.pdf [file bjsports-2015-094805supp_web_references.pdf]

## REFERENCES

1. FIFA, Fédération Internationale de Football Association. FIFA Anti-Doping Regulations. [http://www.fifa.com/mm/document/footballdevelopment/medical/01/17/17/09/anti-doping\\_neutral.pdf](http://www.fifa.com/mm/document/footballdevelopment/medical/01/17/17/09/anti-doping_neutral.pdf), 2015 (accessed March 1, 2015).
2. Corrigan B, Kazlauskas R. Medication use in athletes selected for doping control at the Sydney Olympics (2000). *Clin J Sports Med* 2003;**13**:33-40.
3. Tsitsimpikou C, Tsiokanos A, Tsarouhas K, et al. Medication use by athletes at the Athens 2004 Summer Olympic Games. *Clin J Sports Med* 2009;**19**(1):33-8.
4. Thuayne WV, Delbeke FT. Declared use of medication in sports. *Clin J Sports Med* 2008;**18**(2):143-7.
5. Tscholl P, Alonso JM, Dolle G, et al. The use of drugs and nutritional supplements in top-level track and field athletes. *Am J Sports Med* 2010;**38**(1):133-40.
6. Tscholl P, Feddermann N, Junge A, et al. The use and abuse of painkillers in international soccer: data from 6 FIFA tournaments for female and youth players. *Am J Sports Med* 2009;**37**(2):260-5.
7. Tscholl P, Junge A, Dvorak J. The use of medication and nutritional supplements during FIFA World Cups 2002 and 2006. *Br J Sports Med* 2008;**42**(9):725-30.
8. Tscholl PM, Dvorak J. Abuse of medication during international football competition in 2010 - lesson not learned. *Br J Sports Med* 2012;**46**(16):1140-1.
9. Moynihan R, Heneghan C, Godlee F. Too much medicine: from evidence to action. *BMJ* 2013;**347**:f7141.
10. Alaranta A, Alaranta H, Heliovaara M, et al. Ample use of physician-prescribed medications in Finnish elite athletes. *Int J Sports Med* 2006;**27**(11):919-25.
11. Efe T, Sagnak E, Roessler PP, et al. Penetration of topical diclofenac sodium 4 % spray gel into the synovial tissue and synovial fluid of the knee: a randomised clinical trial. *Knee Surg Sports Traumatol Arthrosc* 2014;**22**(2):345-50.
12. Kuehl KS. Review of the efficacy and tolerability of the diclofenac epolamine topical patch 1.3% in patients with acute pain due to soft tissue injuries. *Clin Ther* 2010;**32**(6):1001-14.
13. Orchard JW, Steet E, Massey A, et al. Long-term safety of using local anesthetic injections in professional rugby league. *Am J Sports Med* 2010;**38**(11):2259-66.
14. Sanchis-Gomar F, Pareja-Galeano H, Gomez-Cabrera MC, et al. Allopurinol prevents cardiac and skeletal muscle damage in professional soccer players. *Scand J Med Sci Sports* 2015;**25**(1):e110-5.
15. Wharam PC, Speedy DB, Noakes TD, et al. NSAID use increases the risk of developing hyponatremia during on Ironman triathlon. *Med Sci Sports Exerc* 2006;**38**(4):618-22.
16. Holmes N, Cronholm PF, Duffy AJ, 3rd, et al. Nonsteroidal anti-inflammatory drug use in collegiate football players. *Clin J Sports Med* 2013;**23**(4):283-6 doi: 10.1097/JSM.0b013e318286d0fa[published Online First: Epub Date]].
17. Warner DC, Schnepf G, Barrett MS, et al. Prevalence, attitudes, and behaviors related to the use of nonsteroidal anti-inflammatory drugs (NSAIDs) in student athletes. *J Adolesc Health* 2002;**30**(3):150-53.
18. Risk factors for the use of medication in elite athletes. ECSS; 2009; Oslo.
19. Huang SH, Johnson K, Pipe AL. The use of dietary supplements and medications by Canadian athletes at the Atlanta and Sydney Olympic Games. *Clin J Sports Med* 2006;**16**(1):27-33.
20. Brune K, Niederweis U, Kaufmann A, et al. [Drug use in participants of the Bonn Marthon 2009]. *MMW Fortschritte der Medizin* 2009;**151**(40):39-41.

21. Küster M, Renner B, Opperl P, et al. Consumption of analgesics before a marathon and the incidence of cardiovascular, gastrointestinal and renal problems: a cohort study. *BMJ Open* 2013;**3**:e002090.
22. Scheer BV, Murray A. Al Andalus Ultra Trail: an observation of medical interventions during a 219-m, 5-day ultramarathon stage race. *Clin J Sports Med* 2011;**21**(5):444-46.
23. Gorski T, Cadore EL, Pinto SS, et al. Use of NSAIDs in triathletes: prevalence, level of awareness and reasons for use. *Br J Sports Med* 2011;**45**(2):85-90.
24. Bergenstock M, Min W, Simon AM, et al. A comparison between the effects of acetaminophen and celecoxib on bone fracture healing in rats. *J Orthop Trauma* 2005;**19**(10):717-23.
25. Giannoudis PV, MacDonald DA, Matthews SJ, et al. Nonunion of the femoral diaphysis. The influence of reaming and non-steroidal anti-inflammatory drugs. *J Bone Joint Surg Br* 2000;**82**(5):655-8.
26. Kjaer M, Bayer ML, Eliasson P, et al. What is the impact of inflammation on the critical interplay between mechanical signaling and biochemical changes in tendon matrix? *J Appl Physiol* 2013;**115**(6):879-83.
27. Trappe TA, White F, Lambert CP, et al. Effect of ibuprofen and acetaminophen on postexercise muscle protein synthesis. *Am J Physiol Endocrinol Metab* 2002;**282**(3):E551-6.
28. Mackey AL. Does an NSAID a Day Keep Satellite Cells at Bay? *J Appl Physiol* 2013;**115**(6):900-8.
29. Slatyer MA, Hensley MJ, Lopert R. A randomized controlled trial of piroxicam in the management of acute ankle sprain in Australian Regular Army recruits. The Kapooka Ankle Sprain Study. *Am J Sports Med* 1997;**25**(4):544-53.
30. Elder CL, Dahners LE, Weinhold PS. A cyclooxygenase-2 inhibitor impairs ligament healing in the rat. *Am J Sports Med* 2001;**29**(6):801-5.
31. Lewis PB, Ruby D, Bush-Joseph CA. Muscle soreness and delayed-onset muscle soreness. *Clin Sports Med* 2012;**31**(2):255-62.
32. Mackey AL, Mikkelsen UR, Magnusson SP, et al. Rehabilitation of muscle after injury - the role of anti-inflammatory drugs. *Scan J Med Sci Sports* 2012;**22**(4):e8-14.
33. Clarsen B, Myklebust G, Bahr R. Development and validation of a new method for the registration of overuse injuries in sports injury epidemiology: the Oslo Sports Trauma Research Centre (OSTRC) overuse injury questionnaire. *Br J Sports Med* 2013;**47**(8):495-502
